# Supplementary material for: High-performance broadband photodetectors based on all-inorganic perovskite CsPb(Br/I)3 nanocrystal/CdS-microwire heterostructures
Source: Royal Society of Chemistry journal article supplement (doi:10.1039/d1ra00890k), 2021-01-01
Supplement: d1ra00890k1.pdf [file d1ra00890k1.pdf]

## Supporting information

### High-Performance Broadband Photodetectors Based on All-inorganic Perovskite CsPb(Br/I)<sub>3</sub> Nanocrystal/CdS-Microwire Heterostructures

Haixia Li,\*Weiwei Lin, Liang Ma, Yang Liu, Yu Wang, Ao Li, Xiaorui Jin, and Lun Xiong\*

School of Optical Information and Energy Engineering, School of Mathematics and Physics, Wuhan Institute of Technology, Guanggu 1<sup>st</sup> Road 206, Wuhan 430205, P. R. China.

\*Corresponding author: Haixia Li: [lihaixia@wit.edu.cn](mailto:lihaixia@wit.edu.cn), Lun Xiong: [xionglun@wit.edu.cn](mailto:xionglun@wit.edu.cn)

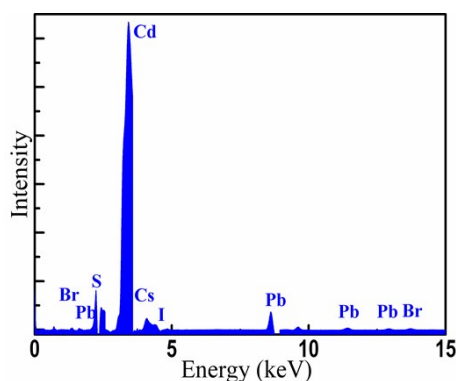

Figure S1: Energy-dispersive spectroscopy (EDS) analysis was used to assess of the fabricated CsPb(Br/I)<sub>3</sub> NC/CdS MW heterostructure.

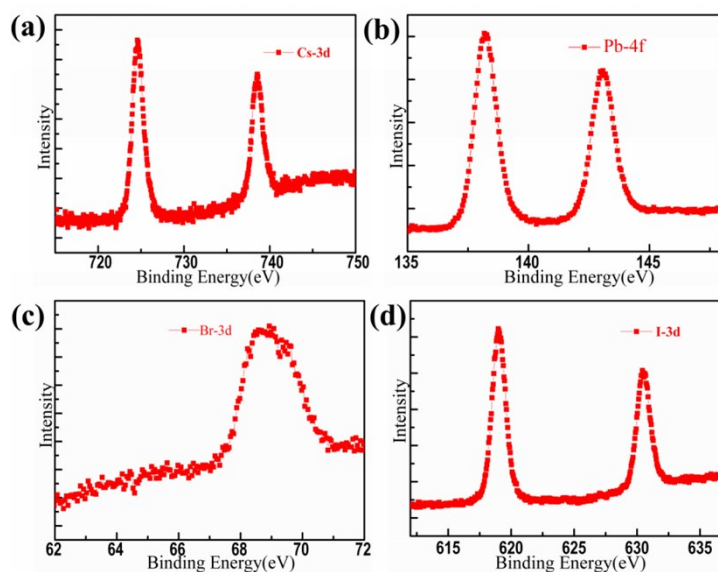

Figure S2 : The high-resolution XPS spectra of Cs-3d, Pb-4f, Br-3d, and I-3d in CsPb(Br/I)<sub>3</sub> NCs were observed at 725.55, 136.15, 69.90, and 619.95 eV, respectively.

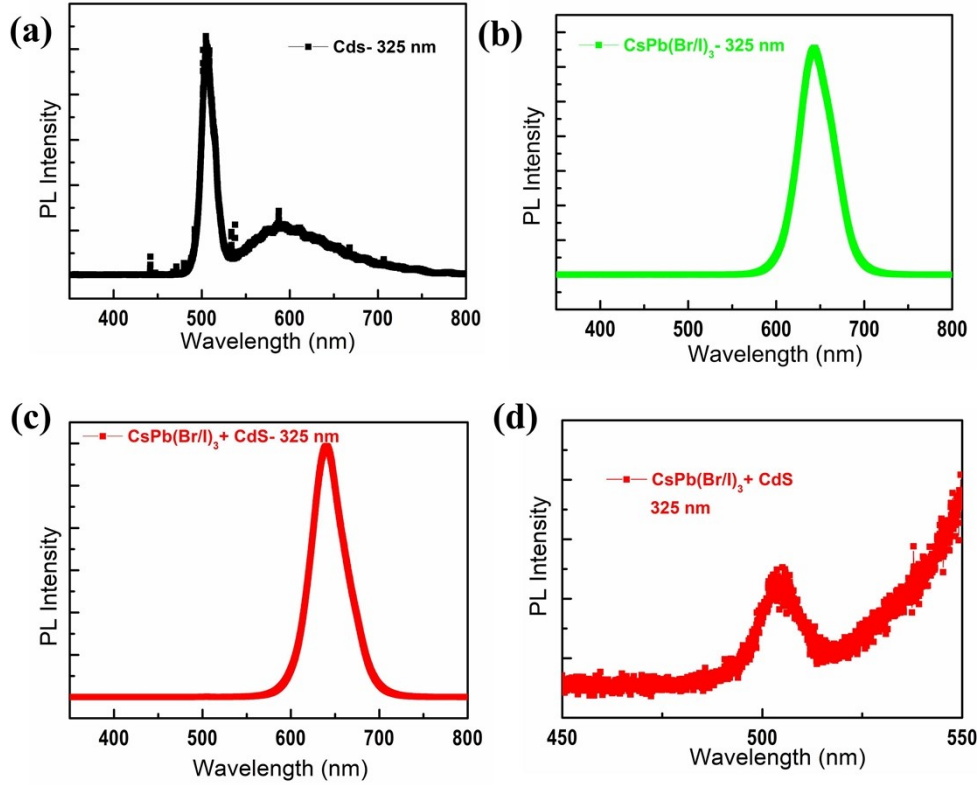

Figure S3: The individual spectra of (a):CdS MWs, (b):CsPb(Br/I)<sub>3</sub> NCs,(c) :CsPb(Br/I)<sub>3</sub> NC/CdS MW-hybrid structures,(d)The magnified view of the PL spectra of CsPb(Br/I)<sub>3</sub> NCs.

Table S1: The parameters (R, EQE, D\*) for the CsPb(Br/I)<sub>3</sub>-NC/CdS-MW- and CdS-MW-based photodetectors under illumination of 365 nm (the applied bias = 5 V).

|                             | $I_{on}/I_{off}$   | Rise/decay time | R(A/W) | EQE   | D*<br>(Jones)         |
|-----------------------------|--------------------|-----------------|--------|-------|-----------------------|
| CdS                         | $1.75 \times 10^3$ | 0.2 s/0.2 s     | 6.28   | 2137% | $3.93 \times 10^{10}$ |
| CdS/CsPb(Br/I) <sub>3</sub> | $3.93 \times 10^3$ | <0.1 s/<0.1 s   | 14.07  | 4789% | $8.81 \times 10^{10}$ |

Table S2: The parameters (R, EQE, D\*) for the CsPb(Br/I)<sub>3</sub>-NC/CdS-MW- and CdS-MW-based photodetectors under illumination of 530 nm (the applied bias = 5 V).

|                             | $I_{on}/I_{off}$   | Rise/decay time | R(A/W) | EQE   | D*<br>(Jones)         |
|-----------------------------|--------------------|-----------------|--------|-------|-----------------------|
| CdS                         | $4.78 \times 10^2$ | 0.2 s/0.2 s     | 2.29   | 537%  | $1.43 \times 10^{10}$ |
| CdS/CsPb(Br/I) <sub>3</sub> | $1.9 \times 10^3$  | <0.1 s/<0.1 s   | 9.11   | 2136% | $5.71 \times 10^{10}$ |

Table S3: The parameters (R, EQE, D\*) for the CsPb(Br/I)<sub>3</sub>-NC/CdS-MW- and CdS-MW-based photodetectors under illumination of 660 nm (the applied bias = 5 V).

|                             | $I_{on}/I_{off}$  | Rise/decay time | R(A/W) | EQE  | D*<br>(Jones)         |
|-----------------------------|-------------------|-----------------|--------|------|-----------------------|
| CdS                         | $2.4 \times 10^2$ | 0.2 s/0.2 s     | 0.73   | 137% | $4.57 \times 10^9$    |
| CdS/CsPb(Br/I) <sub>3</sub> | $1.1 \times 10^3$ | 0.1 s/0.1 s     | 3.36   | 632% | $2.11 \times 10^{10}$ |

Table S4: The parameters (R, EQE, D\*) for the CsPb(Br/I)<sub>3</sub>-NC/CdS-MW- and CdS-MW-based photodetectors under illumination of 760 nm (the applied bias = 5 V).

|                                   | <b>I<sub>on</sub>/I<sub>off</sub></b> | <b>Rise/decay time</b> | <b>R(A/W)</b> | <b>EQE</b> | <b>D*<br/>(Jones)</b> |
|-----------------------------------|---------------------------------------|------------------------|---------------|------------|-----------------------|
| <b>CdS</b>                        | 54                                    | 0.3 s/0.3 s            | 0.125         | 20%        | 7.80×10 <sup>8</sup>  |
| <b>CdS/CsPb(Br/I)<sub>3</sub></b> | 189                                   | 0.1 s/0.1 s            | 0.436         | 71%        | 2.73×10 <sup>9</sup>  |

Table S5: The parameters (R, EQE, D\*) for the CsPb(Br/I)<sub>3</sub>-NC/CdS-MW- and CdS-MW-based photodetectors under illumination of 810 nm (the applied bias = 5 V).

|                                   | <b>I<sub>on</sub>/I<sub>off</sub></b> | <b>Rise/decay time</b> | <b>R(A/W)</b> | <b>EQE</b> | <b>D*<br/>(Jones)</b> |
|-----------------------------------|---------------------------------------|------------------------|---------------|------------|-----------------------|
| <b>CdS</b>                        | 16                                    | 0.3 s/0.3 s            | 0.233         | 36%        | 1.46×10 <sup>9</sup>  |
| <b>CdS/CsPb(Br/I)<sub>3</sub></b> | 41                                    | 0.1 s/0.1 s            | 0.597         | 91%        | 3.74×10 <sup>9</sup>  |
